# Supplementary material
Source: PubMed Central journal article supplement (PMC3776047)
Supplement: NIHMS509068-supplement-MAF1-025001-supp_pdf.pdf [file NIHMS509068-supplement-MAF1-025001-supp_pdf.pdf]

Supporting information for:

# Azadioxatriangulenium (ADOTA<sup>+</sup>): A long fluorescence lifetime fluorophore for large biomolecule binding-assays

Thomas Just Sørensen<sup>a,b</sup>, Erling Thyraug<sup>a,b</sup>, Mariusz Szabelski<sup>a</sup>, Rafal Luchowski<sup>a</sup>, Ignacy Gryczynski<sup>a</sup>, Zygmunt Gryczynski<sup>a,c</sup> & Bo W. Laursen<sup>b\*</sup>

<sup>a</sup> Department of Molecular Biology and Immunology, Center for Commercialization of Fluorescence Technologies, University of North Texas Health Science Center, Fort Worth, Texas 76107, USA

<sup>b</sup> Nano-Science Center & Department of Chemistry, University of Copenhagen, Universitetsparken 5, DK-2100 København Ø, Denmark.

<sup>c</sup> Department of Physics & Astronomy, Texas Christian University, Fort Worth, Texas 76129, USA

Corresponding author: [BWL@nano.ku.dk](mailto:BWL@nano.ku.dk)

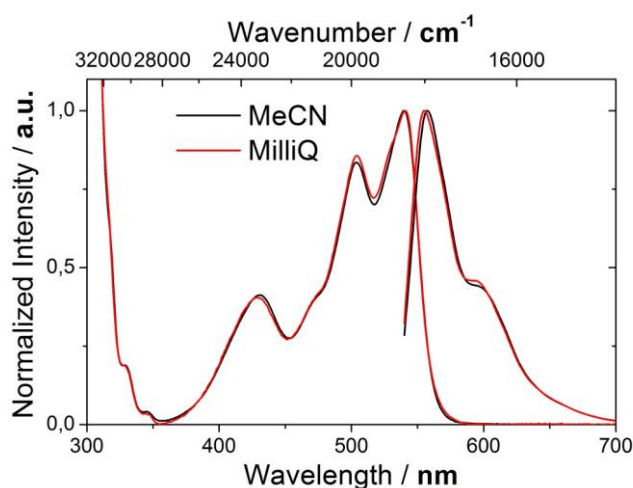

**Figure S1:** Normalized absorption and emission spectra of ADOTA-NHS in MeCN (black) and milliQ water (red). Emission quantum yield in water were determined to 41%, and the lifetime to 20.1 ns.

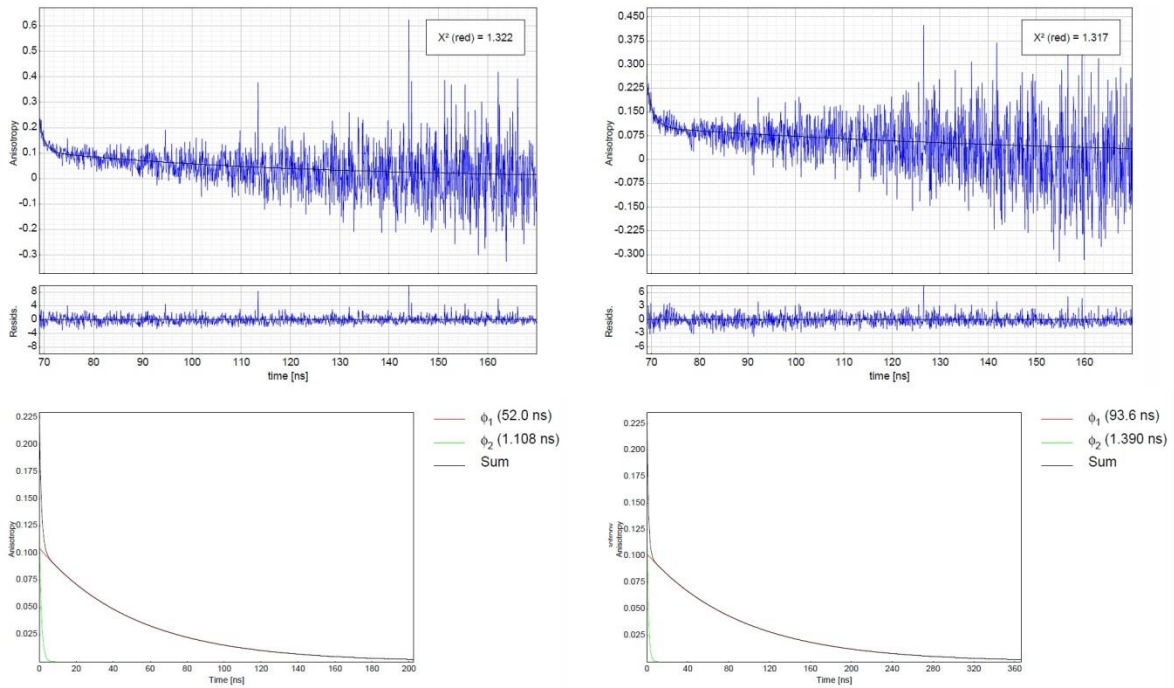

**Figure S2:** Anisotropy decays (top) and component decays (bottom) of ADOTA-antIlgG (left) and ADOTA-antIlgG-IgG (right)

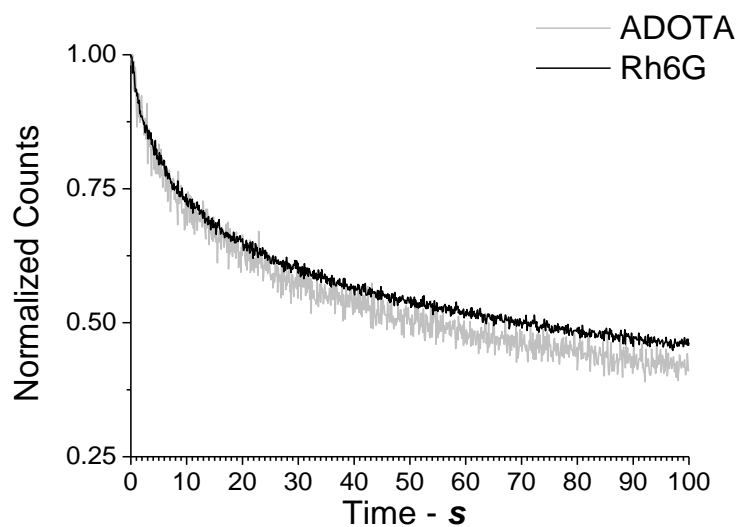

**Figure S3:** Photostability measured by accelerated bleaching using a focused solid state laser.

**Photostability:** A thin and uniform film containing either ADOTA or Rhodamine 6G was prepared by spin coating. Typically a drop of  $\mu\text{M}$  probe in 1% aqueous PVA solution was placed on a microscope cover slip which were spun at 2000 rpm. The experimental set up used is a confocal MicroTime 200 (Picoquant GmbH, Berlin, Germany) system coupled to an Olympus IX71 microscope (Center Valley, PA). Fluorescence photons were gathered from different places of the sample using a 60X water immersion objective (N.A 1.2, Olympus). To remove scattered light, a 488 nm long-pass filter was applied. As a light source, a pulsed laser (470 nm LDH-P-C470B) with a repetition rate of 20MHz was used. Fluorescence photons were collected with the photon-counting module (SPCM-AQR-14; PerkinElmer, Waltham, MA) and processed using the PicoHarp300 time-correlated single photon counting (TCSPC) module.
